# Supplementary material for: Differences in Access to and Preferences for Using Patient Portals and Other eHealth Technologies Based on Race, Ethnicity, and Age: A Database and Survey Study of Seniors in a Large Health Plan
Source: PubMed Central journal article supplement (PMC4799429; doi:10.2196/jmir.5105), 2016-03-04
Supplement: jmir_v18i3e50_app1.pdf [file jmir_v18i3e50_app1.pdf]

Cell denominators for Tables 1 and 2 (kp.org patient portal registration and utilization in 2013)

|                           | Category |        |        |        |        |        |        |
|---------------------------|----------|--------|--------|--------|--------|--------|--------|
|                           | 1        | 2      | 3      | 4      | 5      | 6      | 7      |
| <b>Non-Hispanic white</b> |          |        |        |        |        |        |        |
| 65–69                     | 42,956   | 37,067 | 36,957 | 32,438 | 33,600 | 29,668 | 23,754 |
| 70–74                     | 80,354   | 66,397 | 70,530 | 59,356 | 65,255 | 55,130 | 49,572 |
| 75–79                     | 60,255   | 45,471 | 50,748 | 39,285 | 49,695 | 38,437 | 41,426 |
| <b>Black</b>              |          |        |        |        |        |        |        |
| 65–69                     | 3,986    | 2,442  | 3,385  | 2,152  | 3,158  | 2,042  | 2,929  |
| 70–74                     | 7,325    | 4,059  | 6,302  | 3,600  | 5,940  | 3,417  | 5,643  |
| 75–79                     | 5,587    | 2,642  | 4,588  | 2,248  | 4,487  | 2,195  | 4,434  |
| <b>Latino</b>             |          |        |        |        |        |        |        |
| 65–69                     | 2,923    | 1,958  | 2,517  | 1,748  | 2,312  | 1,620  | 1,908  |
| 70–74                     | 5,250    | 3,345  | 4,607  | 3,006  | 4,309  | 2,831  | 3,668  |
| 75–79                     | 4,236    | 2,452  | 3,593  | 2,122  | 3,530  | 2,075  | 3,179  |
| <b>Filipino</b>           |          |        |        |        |        |        |        |
| 65–69                     | 3,049    | 1,994  | 594    | 1,767  | 2,447  | 1,659  | 2,298  |
| 70–74                     | 5,354    | 3,273  | 4,682  | 2,936  | 4,453  | 2,831  | 4,196  |
| 75–79                     | 3,493    | 1,930  | 2,950  | 1,686  | 2,914  | 1,667  | 2,835  |
| <b>Chinese</b>            |          |        |        |        |        |        |        |
| 65–69                     | 1,461    | 1,258  | 1,315  | 1,144  | 1,089  | 952    | 812    |
| 70–74                     | 2,650    | 2,218  | 2,390  | 2,021  | 2,122  | 1,799  | 1,723  |
| 75–79                     | 2,203    | 1,665  | 19,46  | 1,507  | 1,843  | 1,424  | 1,552  |

**Categories:**

- 1: All in race/ethnicity × age group
- 2: All in race/ethnicity × age group that had a kp.org account by end of 2013.
- 3: Subgroup of race/ethnicity × age group that had ≥1 lab test in 2013
- 4: Subgroup of race/ethnicity × age group that had a kp.org account by end of 2013 and ≥1 lab test in 2013
- 5: Subgroup of race/ethnicity × age group that had ≥1 prescription refill in 2013
- 6: Subgroup of race/ethnicity × age group that had a kp.org account by end of 2013 and ≥1 prescription refill in 2013
- 7: Subgroup of race/ethnicity × age group that was in the health plan's diabetes, hypertension, and/or coronary artery disease chronic disease registry
