# Supplementary material for: Differences in Access to and Preferences for Using Patient Portals and Other eHealth Technologies Based on Race, Ethnicity, and Age: A Database and Survey Study of Seniors in a Large Health Plan
Source: PubMed Central journal article supplement (PMC4799429; doi:10.2196/jmir.5105), 2016-03-04
Supplement: jmir_v18i3e50_app3.pdf [file jmir_v18i3e50_app3.pdf]

**Table 1. Registration for and use of the patient portal by age group and race/ethnicity<sup>a</sup>**

| Use of the patient portal in 2013                                                                                                                           | Age   | All               | Non-Hispanic white | Black               | Latino              | Filipino            | Chinese             |
|-------------------------------------------------------------------------------------------------------------------------------------------------------------|-------|-------------------|--------------------|---------------------|---------------------|---------------------|---------------------|
| <b>Was registered to use the patient portal by end of 2013, %</b>                                                                                           |       |                   |                    |                     |                     |                     |                     |
|                                                                                                                                                             | 65-79 | 77.1              | 81.1               | 54.1 <sup>b</sup>   | 62.5 <sup>b</sup>   | 60.5 <sup>b</sup>   | 81.4                |
|                                                                                                                                                             | 65-69 | 82.2              | 86.3               | 61.3 <sup>b</sup>   | 67.0 <sup>b</sup>   | 65.4 <sup>b</sup>   | 86.1                |
|                                                                                                                                                             | 70-74 | 78.6 <sup>c</sup> | 82.6 <sup>c</sup>  | 55.4 <sup>b,c</sup> | 63.7 <sup>d,e</sup> | 61.1 <sup>b,c</sup> | 83.7                |
|                                                                                                                                                             | 75-79 | 71.5 <sup>c</sup> | 75.5 <sup>c</sup>  | 47.3 <sup>b,c</sup> | 57.9 <sup>b,c</sup> | 55.2 <sup>b,c</sup> | 75.6 <sup>b,c</sup> |
| <b>Signed onto the patient portal ≥1 time in 2013 (if registered to use patient portal at least part of 2013), %</b>                                        |       |                   |                    |                     |                     |                     |                     |
|                                                                                                                                                             | 65-79 | 80.5              | 82.2               | 65.9 <sup>b</sup>   | 70.8 <sup>b</sup>   | 68.9 <sup>b</sup>   | 85.5 <sup>b</sup>   |
|                                                                                                                                                             | 65-69 | 83.3              | 85.0               | 69.4 <sup>b</sup>   | 75.6 <sup>b</sup>   | 74.1 <sup>b</sup>   | 87.5                |
|                                                                                                                                                             | 70-74 | 81.6 <sup>c</sup> | 83.5 <sup>c</sup>  | 66.9 <sup>b</sup>   | 71.8 <sup>d,e</sup> | 69.1 <sup>b,c</sup> | 86.2 <sup>b</sup>   |
|                                                                                                                                                             | 75-79 | 76.4 <sup>c</sup> | 78.2 <sup>c</sup>  | 61.3 <sup>b,c</sup> | 65.7 <sup>b,c</sup> | 63.3 <sup>b,c</sup> | 83.1 <sup>b,c</sup> |
| <b>Used the patient portal to send a message to a doctor, view lab test results, order a prescription refill, or make an appointment ≥1 time in 2013, %</b> |       |                   |                    |                     |                     |                     |                     |
| <b>All members</b>                                                                                                                                          |       |                   |                    |                     |                     |                     |                     |
|                                                                                                                                                             | 65-79 | 59.5              | 64.2               | 32.9 <sup>b</sup>   | 41.4 <sup>b</sup>   | 38.8 <sup>b</sup>   | 67.3 <sup>c</sup>   |
|                                                                                                                                                             | 65-69 | 65.9              | 70.8               | 39.6 <sup>b</sup>   | 47.7 <sup>b</sup>   | 45.3 <sup>b</sup>   | 72.7                |
|                                                                                                                                                             | 70-74 | 61.7 <sup>c</sup> | 66.6 <sup>c</sup>  | 34.3 <sup>b,c</sup> | 42.8 <sup>b,c</sup> | 39.3 <sup>b,c</sup> | 70.1 <sup>c</sup>   |
|                                                                                                                                                             | 75-79 | 51.9 <sup>c</sup> | 56.3 <sup>c</sup>  | 26.3 <sup>b,c</sup> | 35.1 <sup>b,c</sup> | 32.3 <sup>b,c</sup> | 60.3 <sup>c,e</sup> |
| <b>Members registered to use the patient portal for at least part of 2013</b>                                                                               |       |                   |                    |                     |                     |                     |                     |
|                                                                                                                                                             | 65-79 | 77.1              | 79.1               | 60.9 <sup>b</sup>   | 66.2 <sup>b</sup>   | 64.1 <sup>b</sup>   | 82.6 <sup>b</sup>   |
|                                                                                                                                                             | 65-69 | 80.1              | 82.0               | 64.7 <sup>b</sup>   | 71.2 <sup>b</sup>   | 69.3 <sup>b</sup>   | 84.4                |
|                                                                                                                                                             | 70-74 | 78.5 <sup>c</sup> | 80.6 <sup>c</sup>  | 62.0 <sup>b</sup>   | 67.2 <sup>d,e</sup> | 64.3 <sup>b</sup>   | 83.8 <sup>b</sup>   |
|                                                                                                                                                             | 75-79 | 72.6 <sup>c</sup> | 74.6 <sup>c</sup>  | 55.7 <sup>b,c</sup> | 60.7 <sup>b,c</sup> | 58.5 <sup>b,c</sup> | 79.8 <sup>b,c</sup> |
| <b>Sent a secure message through the patient portal ≥1 time in 2013, %</b>                                                                                  |       |                   |                    |                     |                     |                     |                     |
| <b>All members</b>                                                                                                                                          |       |                   |                    |                     |                     |                     |                     |
|                                                                                                                                                             | 65-79 | 46.3              | 50.8               | 23.3 <sup>b</sup>   | 30.1 <sup>b</sup>   | 26.1 <sup>b</sup>   | 49.1                |
|                                                                                                                                                             | 65-69 | 52.3              | 56.9               | 29.4 <sup>b</sup>   | 35.2 <sup>b</sup>   | 31.9 <sup>b</sup>   | 54.2                |
|                                                                                                                                                             | 70-74 | 48.1 <sup>c</sup> | 52.8 <sup>c</sup>  | 24.1 <sup>b,c</sup> | 31.1 <sup>b,c</sup> | 26.5 <sup>b,c</sup> | 52.0                |
|                                                                                                                                                             | 75-79 | 39.7 <sup>c</sup> | 43.7 <sup>c</sup>  | 17.9 <sup>b,c</sup> | 25.4 <sup>b,c</sup> | 20.4 <sup>b,c</sup> | 42.2 <sup>c</sup>   |
| <b>Members registered to use the patient portal for at least part of 2013</b>                                                                               |       |                   |                    |                     |                     |                     |                     |
|                                                                                                                                                             | 65-79 | 60.1              | 62.6               | 43.1 <sup>b</sup>   | 48.2 <sup>b</sup>   | 43.1 <sup>b</sup>   | 60.3 <sup>b</sup>   |
|                                                                                                                                                             | 65-69 | 63.5              | 66.0               | 47.9 <sup>b</sup>   | 52.5 <sup>b</sup>   | 48.8 <sup>b</sup>   | 63.0                |
|                                                                                                                                                             | 70-74 | 61.3 <sup>c</sup> | 63.9 <sup>c</sup>  | 43.6 <sup>b,c</sup> | 48.8 <sup>b</sup>   | 43.3 <sup>b,c</sup> | 62.1                |
|                                                                                                                                                             | 75-79 | 55.5 <sup>c</sup> | 57.9 <sup>c</sup>  | 37.9 <sup>b,c</sup> | 44.0 <sup>b,c</sup> | 36.9 <sup>b,c</sup> | 55.8 <sup>c</sup>   |
| <b>Viewed lab test results using the patient portal ≥1 time in 2013, %</b>                                                                                  |       |                   |                    |                     |                     |                     |                     |
| <b>All members who had ≥1 lab test in 2013</b>                                                                                                              |       |                   |                    |                     |                     |                     |                     |
|                                                                                                                                                             | 65-79 | 62.8              | 68.0               | 33.9 <sup>b</sup>   | 42.7 <sup>b</sup>   | 40.0 <sup>b</sup>   | 69.1                |
|                                                                                                                                                             | 65-69 | 69.2              | 74.5               | 40.5 <sup>b</sup>   | 49.6 <sup>b</sup>   | 47.8 <sup>b</sup>   | 74.6                |
|                                                                                                                                                             | 70-74 | 64.6 <sup>c</sup> | 69.9 <sup>c</sup>  | 35.0 <sup>b,c</sup> | 44.1 <sup>b,c</sup> | 40.3 <sup>b,c</sup> | 71.7                |
|                                                                                                                                                             | 75-79 | 55.6 <sup>c</sup> | 60.6 <sup>c</sup>  | 27.6 <sup>b,c</sup> | 36.0 <sup>b,c</sup> | 32.7 <sup>b,c</sup> | 62.2 <sup>c</sup>   |
| <b>Members who had ≥1 lab test in 2013 and were registered to use the patient portal during at least part of 2013</b>                                       |       |                   |                    |                     |                     |                     |                     |
|                                                                                                                                                             | 65-79 | 79.6              | 82.1               | 60.6 <sup>b</sup>   | 66.5 <sup>b</sup>   | 64.1 <sup>b</sup>   | 83.6                |
|                                                                                                                                                             | 65-69 | 82.4              | 84.8               | 63.7 <sup>b</sup>   | 71.4 <sup>b</sup>   | 70.2 <sup>b</sup>   | 85.7                |
|                                                                                                                                                             | 70-74 | 80.6 <sup>c</sup> | 83.0 <sup>c</sup>  | 61.3 <sup>b</sup>   | 67.6 <sup>b,g</sup> | 64.3 <sup>b,c</sup> | 84.9                |
|                                                                                                                                                             | 75-79 | 75.7 <sup>c</sup> | 78.3 <sup>c</sup>  | 56.4 <sup>b,c</sup> | 60.9 <sup>b,c</sup> | 57.3 <sup>b,c</sup> | 80.3 <sup>c</sup>   |
| <b>Ordered a prescription refill using the patient portal ≥1 time in 2013, %</b>                                                                            |       |                   |                    |                     |                     |                     |                     |
| <b>All members who refilled ≥1 prescription in 2013</b>                                                                                                     |       |                   |                    |                     |                     |                     |                     |
|                                                                                                                                                             | 65-79 | 35.0              | 38.6               | 16.5 <sup>b</sup>   | 21.2 <sup>b</sup>   | 18.5 <sup>b</sup>   | 37.0                |
|                                                                                                                                                             | 65-69 | 42.1              | 46.5               | 21.2 <sup>b</sup>   | 26.6 <sup>b</sup>   | 22.9 <sup>b</sup>   | 44.4                |
|                                                                                                                                                             | 70-74 | 36.5 <sup>c</sup> | 40.4 <sup>c</sup>  | 17.5 <sup>b,c</sup> | 21.8 <sup>b,c</sup> | 18.1 <sup>b,c</sup> | 38.4                |
|                                                                                                                                                             | 75-79 | 28.1 <sup>c</sup> | 31.0 <sup>c</sup>  | 11.9 <sup>b,c</sup> | 16.9 <sup>b,c</sup> | 15.5 <sup>b,c</sup> | 31.1 <sup>c</sup>   |
| <b>Members who refilled ≥1 prescription in 2013 and were registered to use the patient portal at least part of 2013</b>                                     |       |                   |                    |                     |                     |                     |                     |
|                                                                                                                                                             | 65-79 | 44.3              | 46.6               | 29.3 <sup>b</sup>   | 33.0 <sup>b</sup>   | 29.7 <sup>b</sup>   | 44.8                |
|                                                                                                                                                             | 65-69 | 49.9              | 52.6               | 32.9 <sup>b</sup>   | 38.0 <sup>b</sup>   | 33.8 <sup>b</sup>   | 50.8                |
|                                                                                                                                                             | 70-74 | 45.4 <sup>c</sup> | 47.8 <sup>c</sup>  | 30.5 <sup>b</sup>   | 33.3 <sup>b,h</sup> | 28.7 <sup>b,c</sup> | 45.2 <sup>d</sup>   |
|                                                                                                                                                             | 75-79 | 38.3 <sup>c</sup> | 40.0 <sup>c</sup>  | 24.3 <sup>b,c</sup> | 28.8 <sup>b,c</sup> | 27.1 <sup>b,c</sup> | 40.3 <sup>c</sup>   |

**Table1 notes:**

<sup>a</sup>Cell percentages represent use among adults in that age, race/ethnic, or age-race/ethnic subgroup. The denominator for cell percentages in the “All” column includes all non-Hispanic white, black, Latino, Filipino, and Chinese members in that age group. See Multimedia Appendix 1 for cell denominators. Due to the very large denominators for all cells, comparisons with *P* values  $\geq .015$  are not reported. See Multimedia Appendix 3 for detailed *P* values.

<sup>b</sup>Significantly differs (*P*<.001) from non-Hispanic whites within same age group after controlling for sex.

<sup>c</sup>Significantly differs (*P*<.001) from 65-69 age group within All or within same race/ethnic group after controlling for sex.

<sup>d</sup>Significantly differs (*P*=.003) from 65-69 age group within this race/ethnic group after controlling for sex.

<sup>e</sup>Significantly differs (*P*=.001) from non-Hispanic whites in same age group after controlling for sex.

<sup>f</sup>Significantly differs (*P*=.009) from non-Hispanic whites in same age group after controlling for sex.

<sup>g</sup>Significantly differs (*P*=.008) from 65-69 age group within same race/ethnic group after controlling for sex.

<sup>h</sup>Significantly differs (*P*=.002) from 65-69 age group within same race/ethnic group after controlling for sex.

**Table 2. Differences by age cohort and race/ethnic group in use of the health plan’s patient portal in 2013 among patients ages 65-79 who have diabetes, hypertension, and/or coronary artery disease<sup>a</sup>**

| Use of the patient portal in 2013                                                                                                                                                   | Age   | All               | Non-Hispanic white | Black               | Latino              | Filipino            | Chinese             |
|-------------------------------------------------------------------------------------------------------------------------------------------------------------------------------------|-------|-------------------|--------------------|---------------------|---------------------|---------------------|---------------------|
| <b>Was registered to use the patient portal by end of 2013,%</b>                                                                                                                    |       |                   |                    |                     |                     |                     |                     |
|                                                                                                                                                                                     | 65-79 | 76.9              | 81.5               | 55.2 <sup>c</sup>   | 63.0 <sup>c</sup>   | 61.9 <sup>c</sup>   | 82.0                |
|                                                                                                                                                                                     | 65-69 | 82.2              | 86.8               | 63.5 <sup>c</sup>   | 68.3 <sup>c</sup>   | 67.3 <sup>c</sup>   | 87.9                |
|                                                                                                                                                                                     | 70-74 | 78.5 <sup>c</sup> | 83.3 <sup>c</sup>  | 56.2 <sup>b,c</sup> | 64.6 <sup>c,d</sup> | 62.7 <sup>b,c</sup> | 83.7 <sup>e</sup>   |
|                                                                                                                                                                                     | 75-79 | 71.9 <sup>c</sup> | 76.5 <sup>c</sup>  | 48.4 <sup>b,c</sup> | 57.9 <sup>b,c</sup> | 56.3 <sup>b,c</sup> | 77.0 <sup>c</sup>   |
| <b>Used the patient portal to send a secure message to a doctor, view lab test results, order a prescription refill, or make an appointment <math>\geq 1</math> time in 2013, %</b> |       |                   |                    |                     |                     |                     |                     |
|                                                                                                                                                                                     | 65-79 | 63.3              | 69.2               | 36.2 <sup>c</sup>   | 44.5 <sup>c</sup>   | 42.8 <sup>c</sup>   | 71.7 <sup>f</sup>   |
|                                                                                                                                                                                     | 65-69 | 70.3              | 76.7               | 44.1 <sup>c</sup>   | 51.4 <sup>c</sup>   | 50.5 <sup>c</sup>   | 78.6                |
|                                                                                                                                                                                     | 70-74 | 65.4 <sup>c</sup> | 71.6 <sup>c</sup>  | 37.2 <sup>b,c</sup> | 46.4 <sup>b,c</sup> | 43.2 <sup>b,c</sup> | 74.6 <sup>g,h</sup> |
|                                                                                                                                                                                     | 75-79 | 56.6 <sup>c</sup> | 61.9 <sup>c</sup>  | 29.9 <sup>b,c</sup> | 38.2 <sup>b,c</sup> | 35.8 <sup>b,c</sup> | 64.9 <sup>c</sup>   |
| <b>Sent a secure message through the patient portal <math>\geq 1</math> time in 2013, %</b>                                                                                         |       |                   |                    |                     |                     |                     |                     |
|                                                                                                                                                                                     | 65-79 | 49.3              | 54.8               | 25.8 <sup>b</sup>   | 32.6 <sup>b</sup>   | 28.7 <sup>b</sup>   | 52.8 <sup>i</sup>   |
|                                                                                                                                                                                     | 65-69 | 56.0              | 62.2               | 32.5 <sup>b</sup>   | 38.2 <sup>b</sup>   | 35.5 <sup>b</sup>   | 59.6                |
|                                                                                                                                                                                     | 70-74 | 51.2 <sup>c</sup> | 57.0 <sup>c</sup>  | 26.6 <sup>b,c</sup> | 34.1 <sup>c,j</sup> | 29.2 <sup>b,c</sup> | 56.6                |
|                                                                                                                                                                                     | 75-79 | 43.0 <sup>c</sup> | 47.9 <sup>c</sup>  | 20.4 <sup>b,c</sup> | 27.6 <sup>b,c</sup> | 22.4 <sup>b,c</sup> | 45.1 <sup>c,j</sup> |

<sup>a</sup>Study population for this table is members who were in a health plan diabetes, hypertension, or coronary artery disease registry in 2013. Cell percentages represent use among adults in that age, race/ethnic, or age-race/ethnic subgroup. The denominator for cell percentages in the “All” column includes all non-Hispanic white, black, Latino, Filipino, and Chinese members in that age group. See Multimedia Appendix 1 for cell denominators. Due to the large denominators for all cells, comparisons with *P* values  $\geq .055$  are not reported. See Multimedia Appendix 3 for detailed *P* values.

<sup>b</sup>Significantly differs (*P*<.001) from non-Hispanic white within same age group after controlling for sex.

<sup>c</sup>Significantly differs (*P*<.001) from 65-69 age group within All or within same race/ethnic group after controlling for sex.

<sup>d</sup>Significantly differs (*P*=.007) from 65-69 age group within same race/ethnic group after controlling for sex.

<sup>e</sup>Significantly differs (*P*=.005) from 65-69 age group within same race/ethnic group after controlling for sex.

<sup>f</sup>Significantly differs (*P*=.010) from non-Hispanic white within same age group after controlling for sex.

<sup>g</sup>Significantly differs (*P*=.023) from 65-69 age group within same race/ethnic group after controlling for sex.

<sup>h</sup>Significantly differs (*P*=.013) from non-Hispanic white within same age group after controlling for sex.

<sup>i</sup>Significantly differs (*P*=.004) from non-Hispanic white within same age group after controlling for sex.

<sup>j</sup>Significantly differs (*P*<.008) from non-Hispanic white within same age group after controlling for sex.

**Table 3. Characteristics of survey respondents, after weighting, by age group and race/ethnicity<sup>a</sup>**

|                                                                                                   | All, %            | By Age Group, %  |                   |                   |                                      | By Race/Ethnicity, % |                   |                     |                    |  |
|---------------------------------------------------------------------------------------------------|-------------------|------------------|-------------------|-------------------|--------------------------------------|----------------------|-------------------|---------------------|--------------------|--|
|                                                                                                   | 65-79<br>(N=2602) | 65-69<br>(N=841) | 70-74<br>(N=878)  | 75-79<br>(N=883)  | Non-<br>Hispanic<br>white<br>(N=849) | Black<br>(N=567)     | Latino<br>(N=653) | Filipino<br>(N=219) | Chinese<br>(N=314) |  |
| <b>Age group</b>                                                                                  |                   |                  |                   |                   |                                      |                      |                   |                     |                    |  |
| 65-69                                                                                             | 23.5              | n/a              | n/a               | n/a               | 23.4                                 | 23.6                 | 23.6              | 25.6                | 23.1               |  |
| 70-74                                                                                             | 43.7              | n/a              | n/a               | n/a               | 43.8                                 | 43.3                 | 42.3              | 45.0                | 42.0               |  |
| 75-79                                                                                             | 32.8              | n/a              | n/a               | n/a               | 32.8                                 | 33.1                 | 34.1              | 29.4                | 34.9               |  |
| <b>Sex</b>                                                                                        |                   |                  |                   |                   |                                      |                      |                   |                     |                    |  |
| Women                                                                                             | 54.1              | 53.8             | 53.9              | 54.5              | 53.8                                 | 56.9                 | 54.8              | 57.1                | 48.2               |  |
| Men                                                                                               | 45.9              | 46.2             | 46.1              | 45.5              | 46.2                                 | 43.1                 | 45.2              | 42.9                | 51.8               |  |
| <b>Race/ethnicity</b>                                                                             |                   |                  |                   |                   |                                      |                      |                   |                     |                    |  |
| White non-Hispanic                                                                                | 79.4              | 79.0             | 79.6              | 79.5              | n/a                                  | n/a                  | n/a               | n/a                 | n/a                |  |
| Black                                                                                             | 7.3               | 7.3              | 7.3               | 7.4               | n/a                                  | n/a                  | n/a               | n/a                 | n/a                |  |
| Hispanic/Latino                                                                                   | 5.4               | 5.4              | 5.2               | 5.6               | n/a                                  | n/a                  | n/a               | n/a                 | n/a                |  |
| Filipino                                                                                          | 5.2               | 5.6              | 5.3               | 4.6               | n/a                                  | n/a                  | n/a               | n/a                 | n/a                |  |
| Chinese                                                                                           | 2.7               | 2.7              | 2.6               | 2.9               | n/a                                  | n/a                  | n/a               | n/a                 | n/a                |  |
| <b>Educational attainment</b>                                                                     |                   |                  |                   |                   |                                      |                      |                   |                     |                    |  |
| Non-high school graduate                                                                          | 5.0               | 3.2              | 3.1               | 8.9 <sup>b</sup>  | 3.9                                  | 4.7                  | 22.0 <sup>c</sup> | 4.7                 | 4.1                |  |
| High school graduate/GED <sup>d</sup>                                                             | 21.3              | 14.5             | 19.9              | 28.1              | 21.0                                 | 25.2                 | 31.0              | 14.1                | 14.3               |  |
| Some college                                                                                      | 23.8              | 33.4             | 36.1              | 30.8              | 34.2                                 | 45.0                 | 27.8              | 22.7                | 24.6               |  |
| College graduate                                                                                  | 39.9              | 48.9             | 40.9 <sup>e</sup> | 32.2 <sup>b</sup> | 40.9                                 | 25.0 <sup>c</sup>    | 19.2 <sup>c</sup> | 58.4 <sup>c</sup>   | 57.0 <sup>c</sup>  |  |
| <b>Household income in US\$ in 2010<sup>a</sup></b>                                               |                   |                  |                   |                   |                                      |                      |                   |                     |                    |  |
| ≤25,000                                                                                           | 17.7              | 11.9             | 18.7 <sup>b</sup> | 26.7 <sup>b</sup> | 15.8                                 | 26.1 <sup>c</sup>    | 22.3 <sup>c</sup> | 29.3 <sup>c</sup>   | 16.8               |  |
| 25,001-35,000                                                                                     | 12.6              | 10.0             | 13.2              | 16.5              | 11.9                                 | 16.3                 | 17.5              | 17.5                | 8.7                |  |
| 35,001-80,000                                                                                     | 42.0              | 42.9             | 42.6              | 39.6              | 42.1                                 | 39.7                 | 43.9              | 43.9                | 41.3               |  |
| >80,000                                                                                           | 27.7              | 35.2             | 25.5 <sup>b</sup> | 17.2 <sup>b</sup> | 30.2                                 | 17.8 <sup>c</sup>    | 16.3 <sup>c</sup> | 16.3 <sup>c</sup>   | 33.3               |  |
| <b>Self-rated health</b>                                                                          |                   |                  |                   |                   |                                      |                      |                   |                     |                    |  |
| Very good or excellent                                                                            | 43.8              | 49.7             | 46.8              | 35.6 <sup>b</sup> | 48.3                                 | 21.2 <sup>c</sup>    | 28.0 <sup>c</sup> | 25.9 <sup>c</sup>   | 38.9 <sup>g</sup>  |  |
| Good                                                                                              | 38.1              | 34.8             | 38.2              | 40.2              | 35.9                                 | 48.8                 | 39.9              | 49.7                | 44.8               |  |
| Fair or poor                                                                                      | 18.1              | 15.5             | 15.0              | 24.2 <sup>b</sup> | 15.8                                 | 30.0 <sup>c</sup>    | 32.1 <sup>c</sup> | 24.4 <sup>h</sup>   | 16.3               |  |
| History of diabetes, hypertension, coronary artery disease, heart failure, or stroke <sup>i</sup> | 71.7              | 62.1             | 70.3 <sup>j</sup> | 80.6 <sup>b</sup> | 69.0                                 | 87.4 <sup>c</sup>    | 77.8 <sup>c</sup> | 86.5 <sup>c</sup>   | 70.5               |  |
| Takes medication for ≥1 chronic condition                                                         | 90.5              | 87.2             | 90.3              | 93.3 <sup>k</sup> | 89.9                                 | 95.4 <sup>c</sup>    | 90.7              | 94.9 <sup>l</sup>   | 86.8               |  |

<sup>a</sup>Cell percentages are based on weighted data for everyone in that age or race/ethnic group. Ns at top of columns are the unweighted number of respondents in that group. *P* values ≥.055 are not reported. See Multimedia Appendix 3 for detailed *P* values.

<sup>b</sup>Significantly differs (*P*<.001) from 65-69 age group after controlling for race/ethnicity and sex.

<sup>c</sup>Significantly differs (*P*<.001) from non-Hispanic white after controlling for age group and sex.

<sup>d</sup>GED = General Educational Development (credential indicating that individual has met high school level academic skills)

<sup>e</sup>Significantly differs (*P*=.020) from 65-69 age group after controlling for race/ethnicity and sex.

<sup>f</sup>Based on estimates from a 2011 health survey of the same health plan membership. A household income ≤\$35,000 qualifies an individual for income-subsidized, low income housing.

<sup>g</sup>Significantly differs (*P*=.008) from non-Hispanic white after controlling for age group and sex.

<sup>h</sup>Significantly differs (*P*=.004) from non-Hispanic white after controlling for age group and sex.

<sup>i</sup>In ≥ 1 of the health plan's chronic disease registries for these conditions

<sup>j</sup>Significantly differs (*P*=.012) from 65-69 age group after controlling for race/ethnicity and sex.

<sup>k</sup>Significantly differs (*P*<.01) from 65-69 age group after controlling for race/ethnicity and sex.

<sup>l</sup>Significantly differs (*P*<.05) from non-Hispanic white after controlling for age group and sex.

**Table 4. Seniors' access to digital devices, Internet, and email, by age group and race/ethnicity<sup>a</sup>**

|                                                                             | All               |                  | By Age Group      |                   |                                      |                   | By Race/Ethnicity |                     |                    |  |
|-----------------------------------------------------------------------------|-------------------|------------------|-------------------|-------------------|--------------------------------------|-------------------|-------------------|---------------------|--------------------|--|
|                                                                             | 65-79<br>(N=2602) | 65-69<br>(n=841) | 70-74<br>(n=878)  | 75-79<br>(n=883)  | Non-<br>Hispanic<br>white<br>(n=849) | Black<br>(n=567)  | Latino<br>(n=653) | Filipino<br>(n=219) | Chinese<br>(n=314) |  |
| <b>Has access to a mobile phone (cellular phone or smartphone),%</b>        | 81.0              | 88.4             | 84.3              | 71.2 <sup>b</sup> | 82.2                                 | 82.8              | 72.6 <sup>c</sup> | 70.2 <sup>c</sup>   | 77.0               |  |
| Has a smartphone                                                            | 31.2              | 43.4             | 33.9 <sup>d</sup> | 18.7 <sup>b</sup> | 32.8                                 | 30.5              | 22.0 <sup>c</sup> | 19.6 <sup>c</sup>   | 26.6 <sup>e</sup>  |  |
| Able to receive text messages                                               | 47.2              | 61.5             | 51.4 <sup>f</sup> | 31.4 <sup>b</sup> | 47.4                                 | 53.6 <sup>g</sup> | 41.0 <sup>h</sup> | 45.1                | 54.9               |  |
| If has a mobile phone                                                       | 60.5              | 71.2             | 63.1 <sup>i</sup> | 46.5 <sup>b</sup> | 60.5                                 | 59.6              | 68.4 <sup>j</sup> | 59.9                | 67.0               |  |
| <b>Owns or has easy access to a computer, laptop, netbook, or tablet, %</b> | 81.5              | 91.5             | 82.5 <sup>b</sup> | 73.1 <sup>b</sup> | 85.3                                 | 70.7 <sup>c</sup> | 63.0 <sup>c</sup> | 57.5 <sup>c</sup>   | 82.8               |  |
| Desktop, laptop, or netbook                                                 | 79.5              | 90.4             | 80.0 <sup>b</sup> | 71.2 <sup>b</sup> | 83.5                                 | 69.1 <sup>c</sup> | 61.1 <sup>c</sup> | 53.1 <sup>c</sup>   | 79.8               |  |
| Tablet                                                                      | 25.1              | 34.3             | 27.4 <sup>k</sup> | 15.6 <sup>b</sup> | 27.1                                 | 16.0 <sup>c</sup> | 12.6 <sup>c</sup> | 20.1 <sup>l</sup>   | 28.3               |  |
| Has home Internet                                                           | 83.8              | 91.3             | 85.5 <sup>d</sup> | 76.2 <sup>b</sup> | 87.4                                 | 71.9 <sup>g</sup> | 68.4 <sup>c</sup> | 61.0 <sup>c</sup>   | 84.8               |  |
| <b>Able to use the Internet, %</b>                                          |                   |                  |                   |                   |                                      |                   |                   |                     |                    |  |
| Able to use on own or with help                                             | 79.4              | 88.9             | 81.5 <sup>b</sup> | 68.7 <sup>b</sup> | 83.9                                 | 64.4 <sup>c</sup> | 58.2 <sup>c</sup> | 53.3 <sup>c</sup>   | 79.2               |  |
| Uses on own                                                                 | 69.4              | 80.7             | 70.8 <sup>b</sup> | 59.4 <sup>b</sup> | 74.4                                 | 51.8 <sup>c</sup> | 48.0 <sup>c</sup> | 39.3 <sup>c</sup>   | 69.4               |  |
| Uses with help or proxy uses                                                | 10.0              | 8.2              | 10.7              | 10.3              | 9.5                                  | 12.6              | 10.2              | 14.0                | 9.8                |  |
| If uses the Internet, how frequently goes online                            | (n=1886)          | (n=707)          | (n=637)           | (n=542)           | (n=714)                              | (n=390)           | (n=410)           | (n=125)             | (n=247)            |  |
| Daily                                                                       | 64.2              | 70.0             | 64.3              | 58.8 <sup>m</sup> | 66.2                                 | 51.1 <sup>c</sup> | 53.7 <sup>c</sup> | 47.2 <sup>c</sup>   | 66.0               |  |
| ≤1x/wk                                                                      | 16.6              | 16.7             | 16.7              | 18.8              | 15.1                                 | 28.3 <sup>c</sup> | 25.8 <sup>c</sup> | 26.2 <sup>n</sup>   | 14.4               |  |
| <b>Able to use email, %</b>                                                 | (N=2594)          | (n=839)          | (n=876)           | (n=879)           | (n=848)                              | (n=565)           | (n=650)           | (n=217)             | (n=314)            |  |
| Able to use by self or with help                                            | 79.3              | 86.1             | 81.2 <sup>o</sup> | 72.1 <sup>b</sup> | 83.4                                 | 63.2 <sup>c</sup> | 59.6 <sup>c</sup> | 58.5 <sup>c</sup>   | 80.8               |  |
| Uses on own                                                                 | 70.0              | 80.2             | 71.9 <sup>p</sup> | 60.3 <sup>b</sup> | 74.7                                 | 52.6 <sup>c</sup> | 49.1 <sup>c</sup> | 43.0 <sup>c</sup>   | 72.6               |  |
| Uses with help or proxy uses                                                | 9.3               | 5.9              | 9.3               | 11.8 <sup>m</sup> | 8.8                                  | 10.6              | 10.6              | 15.6 <sup>q</sup>   | 8.2                |  |
| Has an email address                                                        | 76.2              | 82.4             | 78.4              | 68.6 <sup>b</sup> | 80.5                                 | 60.0 <sup>c</sup> | 57.9 <sup>c</sup> | 51.3 <sup>c</sup>   | 76.3               |  |
| Has own email address                                                       | 63.8              | 68.5             | 66.3              | 57.2 <sup>b</sup> | 67.3                                 | 51.2 <sup>c</sup> | 48.2 <sup>c</sup> | 42.6 <sup>c</sup>   | 65.7               |  |
| Shares an email address (may also have own)                                 | 11.3              | 13.5             | 11.4              | 9.5               | 13.0                                 | 6.2 <sup>c</sup>  | 6.9 <sup>c</sup>  | 4.9 <sup>r</sup>    | 8.2 <sup>s</sup>   |  |
| Uses someone else's email address                                           | 1.8               | 1.4              | 1.7               | 2.2               | 1.4                                  | 3.1 <sup>t</sup>  | 3.6 <sup>u</sup>  | 3.7 <sup>v</sup>    | 2.4                |  |
| If receives email, how frequently checks for email                          | (n=1866)          | (n=682)          | (n=630)           | (n=554)           | (n=699)                              | (n=377)           | (n=420)           | (n=124)             | (n=246)            |  |
| Daily                                                                       | 67.9              | 70.4             | 68.6              | 64.8              | 70.0                                 | 49.5 <sup>c</sup> | 59.5 <sup>c</sup> | 56.4 <sup>w</sup>   | 70.5               |  |
| ≤1x/wk                                                                      | 13.8              | 12.4             | 12.2              | 17.4              | 12.3                                 | 24.6 <sup>c</sup> | 22.9 <sup>c</sup> | 22.2 <sup>x</sup>   | 13.7               |  |

<sup>a</sup>Cell percentages based on weighted data for everyone in that age or race/ethnic group. Ns at top of columns are the unweighted number of respondents in that group except when analyses are restricted to a subset of that group. *P* values ≥.055 are not reported. See Multimedia Appendix 3 for detailed *P* values.

<sup>b</sup>Significantly differs (*P*<.001) from 65-69 age group after controlling for race/ethnicity and sex.

<sup>c</sup>Significantly differs (*P*<.001) from non-Hispanic white after controlling for age group and sex.

<sup>d</sup>Significantly differs (*P*=.005) from 65-69 age group after controlling for race/ethnicity and sex.

<sup>e</sup>Significantly differs (*P*=.053) from non-Hispanic white after controlling for age group and sex.

<sup>f</sup>Significantly differs (*P*=.004) from 65-69 age group after controlling for race/ethnicity and sex.

<sup>g</sup>Significantly differs (*P*=.033) from non-Hispanic white after controlling for age group and sex.

<sup>h</sup>Significantly differs (*P*=.023) from non-Hispanic white after controlling for age group and sex.

<sup>i</sup>Significantly differs (*P*=.030) from 65-69 age group after controlling for race/ethnicity and sex.

<sup>j</sup>Significantly differs (*P*=.006) from non-Hispanic white after controlling for age group and sex.

<sup>k</sup>Significantly differs (*P*=.031) from 65-69 age group after controlling for race/ethnicity and sex.

Table 4 notes (contd.):

- <sup>l</sup>Significantly differs ( $P = .028$ ) from non-Hispanic white after controlling for age group and sex.
- <sup>m</sup>Significantly differs ( $P = .002$ ) from 65-69 age group after controlling for race/ethnicity and sex.
- <sup>n</sup>Significantly differs ( $P = .014$ ) from non-Hispanic white after controlling for age group and sex.
- <sup>o</sup>Significantly differs ( $P = .048$ ) from 65-69 age group after controlling for race/ethnicity and sex.
- <sup>p</sup>Significantly differs ( $P = .003$ ) from 65-69 age group after controlling for race/ethnicity and sex.
- <sup>q</sup>Significantly differs ( $P = .005$ ) from non-Hispanic white after controlling for age group and sex.
- <sup>r</sup>Significantly differs ( $P = .002$ ) from non-Hispanic white after controlling for age group and sex.
- <sup>s</sup>Significantly differs ( $P = .038$ ) from non-Hispanic white after controlling for age group and sex.
- <sup>t</sup>Significantly differs ( $P = .048$ ) from non-Hispanic white after controlling for age group and sex.
- <sup>u</sup>Significantly differs ( $P = .012$ ) from non-Hispanic white after controlling for age group and sex.
- <sup>v</sup>Significantly differs ( $P = .049$ ) from Non-Hispanic white after controlling for age group and sex.
- <sup>w</sup>Significantly differs ( $P = .008$ ) from Non-Hispanic white after controlling for age group and sex.
- <sup>x</sup>Significantly differs ( $P = .010$ ) from Non-Hispanic white after controlling for age group and sex.

**Table 5. Seniors' perceptions of their ability to perform health care-related tasks involving digital technology<sup>a</sup>**

| Task                                                                                                                             | By Age Group    |                   |                   |                   | By Race/Ethnicity                |                   |                   |                     |                    |
|----------------------------------------------------------------------------------------------------------------------------------|-----------------|-------------------|-------------------|-------------------|----------------------------------|-------------------|-------------------|---------------------|--------------------|
|                                                                                                                                  | All<br>(N=2586) | 65-69<br>(N=837)  | 70-74<br>(N=875)  | 75-79<br>(N=874)  | Non-Hispanic<br>white<br>(N=847) | Black<br>(N=562)  | Latino<br>(N=648) | Filipino<br>(N=218) | Chinese<br>(N=311) |
| <b>Send a message to doctor through the patient portal if had a question, %</b>                                                  |                 |                   |                   |                   |                                  |                   |                   |                     |                    |
| Could do by self                                                                                                                 | 64.2            | 76.1              | 66.3 <sup>b</sup> | 52.9 <sup>c</sup> | 68.6                             | 47.2 <sup>d</sup> | 44.3 <sup>d</sup> | 40.9 <sup>d</sup>   | 63.3               |
| Could do by self or with help                                                                                                    | 79.7            | 88.2              | 81.7 <sup>b</sup> | 71.1 <sup>c</sup> | 82.9                             | 67.2 <sup>d</sup> | 63.6 <sup>d</sup> | 66.1 <sup>d</sup>   | 79.6               |
| <b>Look up test result on the patient portal, %</b>                                                                              |                 |                   |                   |                   |                                  |                   |                   |                     |                    |
| Could do by self                                                                                                                 | 64.5            | 76.4              | 66.8 <sup>b</sup> | 52.8 <sup>c</sup> | 69.0                             | 45.7 <sup>d</sup> | 43.6 <sup>d</sup> | 40.2 <sup>d</sup>   | 68.2               |
| Could do by self or with help                                                                                                    | 78.4            | 87.3              | 80.5 <sup>b</sup> | 69.2 <sup>c</sup> | 81.9                             | 63.8 <sup>d</sup> | 60.6 <sup>d</sup> | 61.2 <sup>d</sup>   | 82.6               |
| <b>Complete a short form or questionnaire on a computer, %</b>                                                                   |                 |                   |                   |                   |                                  |                   |                   |                     |                    |
| Could do by self                                                                                                                 | 65.4            | 76.0              | 68.9 <sup>b</sup> | 53.2 <sup>c</sup> | 69.4                             | 51.2 <sup>d</sup> | 45.3 <sup>d</sup> | 45.0 <sup>d</sup>   | 67.2               |
| Could do by self or with help                                                                                                    | 76.4            | 86.1              | 78.9 <sup>b</sup> | 66.3 <sup>c</sup> | 79.8                             | 63.3 <sup>d</sup> | 59.3 <sup>d</sup> | 58.4 <sup>d</sup>   | 79.7               |
| <b>Complete a questionnaire using a touch screen tablet (such as an iPad) while sitting in a clinic waiting room, %</b>          |                 |                   |                   |                   |                                  |                   |                   |                     |                    |
| Could do by self                                                                                                                 | 35.2            | 51.4              | 38.1 <sup>c</sup> | 20.0 <sup>c</sup> | 37.6                             | 28.1 <sup>d</sup> | 23.0 <sup>d</sup> | 21.6 <sup>d</sup>   | 34.3               |
| Could do by self or with help                                                                                                    | 45.9            | 63.5 <sup>h</sup> | 49.3 <sup>c</sup> | 28.7 <sup>c</sup> | 47.7                             | 40.6 <sup>e</sup> | 34.6 <sup>d</sup> | 36.1 <sup>f</sup>   | 47.4               |
| <b>Answer questions about your health using your phone's keypad (eg, Enter 1 if 'Always', 2 if 'Sometimes', 3 if 'Never'), %</b> |                 |                   |                   |                   |                                  |                   |                   |                     |                    |
| Could do by self                                                                                                                 | 52.1            | 62.5              | 55.0 <sup>g</sup> | 41.0 <sup>c</sup> | 54.6                             | 49.4              | 37.8 <sup>d</sup> | 34.5 <sup>d</sup>   | 50.3               |
| Could do by self or with help                                                                                                    | 59.3            | 70.9              | 61.3 <sup>b</sup> | 48.5 <sup>c</sup> | 61.0                             | 57.3              | 46.2 <sup>d</sup> | 50.9 <sup>e</sup>   | 59.5               |
| <b>Go to a website to get information or forms using a URL (website address) given orally or in a letter, %</b>                  |                 |                   |                   |                   |                                  |                   |                   |                     |                    |
| Could do by self                                                                                                                 | 50.9            | 66.9              | 52.1 <sup>c</sup> | 38.0 <sup>c</sup> | 55.2                             | 37.9 <sup>d</sup> | 30.4 <sup>d</sup> | 24.3 <sup>d</sup>   | 51.3               |
| Could do by self or with help                                                                                                    | 60.2            | 75.3              | 61.8 <sup>c</sup> | 47.4 <sup>c</sup> | 63.3                             | 49.6 <sup>d</sup> | 42.6 <sup>d</sup> | 42.9 <sup>d</sup>   | 65.2               |
| <b>Print information or forms from a website, %</b>                                                                              |                 |                   |                   |                   |                                  |                   |                   |                     |                    |
| Could do by self                                                                                                                 | 60.6            | 72.0              | 63.2 <sup>b</sup> | 48.8 <sup>c</sup> | 65.3                             | 46.2 <sup>d</sup> | 39.2 <sup>d</sup> | 30.8 <sup>d</sup>   | 60.7               |
| Could do by self or with help                                                                                                    | 70.4            | 81.7              | 72.3 <sup>c</sup> | 59.9 <sup>c</sup> | 74.0                             | 58.1 <sup>d</sup> | 50.8 <sup>d</sup> | 50.8 <sup>d</sup>   | 74.3               |

<sup>a</sup>Cell percentages are based on weighted data for everyone in the age or race/ethnic group. *P* values  $\geq .055$  are not reported. See Multimedia Appendix 3 for detailed *P* values). Ns at top of columns are the unweighted number of respondents in that group.

<sup>b</sup>Significantly differs ( $P=.001$ ) from 65-69 age group after controlling for race/ethnicity and sex.

<sup>c</sup>Significantly differs ( $P<.001$ ) from 65-69 age group after controlling for race/ethnicity and sex.

<sup>d</sup>Significantly differs ( $P<.001$ ) from non-Hispanic white after controlling for age group and sex.

<sup>e</sup>Significantly differs ( $P=.007$ ) from 65-69 age group after controlling for race/ethnicity and sex.

<sup>f</sup>Significantly differs ( $P=.004$ ) from 65-69 age group after controlling for race/ethnicity and sex.

<sup>g</sup>Significantly differs ( $P=.006$ ) from 65-69 age group after controlling for race/ethnicity and sex.

<sup>h</sup>Significantly differs ( $P=.023$ ) from 65-69 age group after controlling for race/ethnicity and sex.

<sup>i</sup>Significantly differs ( $P=.008$ ) from 65-69 age group after controlling for race/ethnicity and sex.

<sup>j</sup>Significantly differs ( $P=.009$ ) from non-Hispanic white after controlling for age group and sex.

<sup>k</sup>Significantly differs ( $P=.001$ ) from non-Hispanic white after controlling for age group and sex.

<sup>l</sup>Significantly differs ( $P=.026$ ) from 65-69 age group after controlling for race/ethnicity and sex.

<sup>m</sup>Significantly differs ( $P=.005$ ) from 65-69 age group after controlling for race/ethnicity and sex.

<sup>n</sup>Significantly differs ( $P=.008$ ) from non-Hispanic white after controlling for age group and sex.

**Table 6. Methods used and preferred for performing tasks that could be done through the patient portal<sup>a</sup>**

|                                                                                    | All      |         | By Age Group      |                    |                    |                    | By Race/Ethnicity |                    |                    |  |
|------------------------------------------------------------------------------------|----------|---------|-------------------|--------------------|--------------------|--------------------|-------------------|--------------------|--------------------|--|
|                                                                                    | 65-79    | 65-69   | 70-74             | 75-79              | non-Hispanic white | Black              | Latino            | Filipino           | Chinese            |  |
| <b>Initiate non-urgent communications with doctors</b>                             | (N=2534) | (N=822) | (N=858)           | (N=854)            | (N=826)            | (N=555)            | (N=628)           | (N=215)            | (N=310)            |  |
| <b>Send a secure message using the patient portal, %</b>                           |          |         |                   |                    |                    |                    |                   |                    |                    |  |
| Uses this method                                                                   | 58.2     | 70.0    | 58.7 <sup>b</sup> | 48.8 <sup>b</sup>  | 63.6               | 33.8 <sup>c</sup>  | 36.6 <sup>c</sup> | 32.2 <sup>c</sup>  | 55.6 <sup>d</sup>  |  |
| Most prefers this method                                                           | 51.8     | 63.9    | 53.8 <sup>e</sup> | 40.5 <sup>b</sup>  | 57.7               | 25.2 <sup>c</sup>  | 29.0 <sup>c</sup> | 25.0 <sup>c</sup>  | 46.7 <sup>f</sup>  |  |
| <b>Send a message using regular email (discouraged), %</b>                         |          |         |                   |                    |                    |                    |                   |                    |                    |  |
| Uses this method                                                                   | 8.2      | 8.5     | 9.8               | 6.0                | 8.1                | 7.0                | 7.3               | 10.1               | 14.5 <sup>g</sup>  |  |
| Most prefers this method                                                           | 4.8      | 3.5     | 6.4               | 3.5                | 4.9                | 3.3                | 4.4               | 3.3                | 7.5                |  |
| <b>Leave phone message and get return call, %</b>                                  |          |         |                   |                    |                    |                    |                   |                    |                    |  |
| Uses this method                                                                   | 53.7     | 48.0    | 50.0              | 62.6 <sup>b</sup>  | 48.8               | 76.9 <sup>c</sup>  | 71.3 <sup>c</sup> | 75.9 <sup>c</sup>  | 58.0 <sup>h</sup>  |  |
| Most prefers this method                                                           | 43.5     | 32.9    | 39.9 <sup>i</sup> | 56.0 <sup>b</sup>  | 37.5               | 71.6 <sup>c</sup>  | 67.0 <sup>c</sup> | 72.7 <sup>c</sup>  | 45.8 <sup>j</sup>  |  |
| <b>Obtain results of lab tests</b>                                                 | (N=2594) | (N=838) | (N=874)           | (N=882)            | (N=847)            | (N=566)            | (N=649)           | (N=219)            | (N=313)            |  |
| <b>Look up results online using the patient portal, %</b>                          |          |         |                   |                    |                    |                    |                   |                    |                    |  |
| Uses this method                                                                   | 54.4     | 64.9    | 55.4 <sup>k</sup> | 45.5 <sup>b</sup>  | 58.8               | 31.1 <sup>c</sup>  | 36.3              | 33.5 <sup>c</sup>  | 63.6               |  |
| Most prefers this method                                                           | 38.9     | 47.3    | 41.2              | 30.1 <sup>b</sup>  | 42.9               | 21.4 <sup>c</sup>  | 21.4 <sup>c</sup> | 15.6 <sup>c</sup>  | 45.7               |  |
| <b>Result sent in a secure message using the patient portal, %</b>                 |          |         |                   |                    |                    |                    |                   |                    |                    |  |
| Uses this method                                                                   | 32.9     | 35.7    | 35.1              | 27.8 <sup>l</sup>  | 34.2               | 25.0 <sup>c</sup>  | 26.1 <sup>m</sup> | 32.7               | 28.2               |  |
| Most prefers this method                                                           | 19.1     | 19.6    | 20.4              | 17.2               | 20.4               | 11.1 <sup>c</sup>  | 15.1 <sup>n</sup> | 19.6               | 10.7 <sup>c</sup>  |  |
| <b>Look up results online or get in secure message using the patient portal, %</b> |          |         |                   |                    |                    |                    |                   |                    |                    |  |
| Uses this method                                                                   | 66.6     | 74.4    | 69.3              | 57.5 <sup>b</sup>  | 70.8               | 43.6 <sup>c</sup>  | 48.4 <sup>c</sup> | 51.6 <sup>c</sup>  | 71.4               |  |
| Most prefers this method                                                           | 57.9     | 66.8    | 61.2              | 47.3 <sup>b</sup>  | 63.1               | 32.3 <sup>c</sup>  | 36.3 <sup>c</sup> | 35.2 <sup>c</sup>  | 56.5               |  |
| <b>Get a letter in the mail with the result, %</b>                                 |          |         |                   |                    |                    |                    |                   |                    |                    |  |
| Uses this method                                                                   | 51.8     | 48.6    | 50.3              | 56.0 <sup>o</sup>  | 47.9               | 71.2 <sup>c</sup>  | 66.3 <sup>c</sup> | 68.3 <sup>c</sup>  | 53.6               |  |
| Most prefers this method                                                           | 35.6     | 28.7    | 33.1              | 44.0 <sup>b</sup>  | 30.5               | 57.6 <sup>c</sup>  | 54.0 <sup>c</sup> | 63.2 <sup>c</sup>  | 40.4 <sup>p</sup>  |  |
| <b>Have someone from call with the result, %</b>                                   |          |         |                   |                    |                    |                    |                   |                    |                    |  |
| Uses this method                                                                   | 18.4     | 16.7    | 17.1              | 21.4               | 17.7               | 27.9 <sup>c</sup>  | 22.1              | 15.1               | 13.5               |  |
| Most prefers this method                                                           | 7.3      | 5.1     | 6.5               | 9.9 <sup>q</sup>   | 7.1                | 10.5               | 11.0 <sup>r</sup> | 3.9                | 3.8                |  |
| <b>Order prescription refills<sup>s</sup></b>                                      | (N=2258) | (N=715) | (N=764)           | (N=779)            | (N=731)            | (N=521)            | (N=561)           | (N=187)            | (N=258)            |  |
| <b>Place order online using the patient portal, %</b>                              |          |         |                   |                    |                    |                    |                   |                    |                    |  |
| Uses this method                                                                   | 35.7     | 45.0    | 39.1              | 24.8 <sup>b</sup>  | 39.7               | 20.0 <sup>c</sup>  | 22.1 <sup>c</sup> | 12.8 <sup>c</sup>  | 36.1               |  |
| Most prefers this method                                                           | 33.5     | 42.3    | 37.4              | 21.7 <sup>b</sup>  | 37.2               | 16.3 <sup>c</sup>  | 19.8 <sup>c</sup> | 12.2 <sup>c</sup>  | 34.3               |  |
| <b>Place order by phone, %</b>                                                     |          |         |                   |                    |                    |                    |                   |                    |                    |  |
| Uses this method                                                                   | 63.3     | 58.5    | 59.5              | 71.6 <sup>b</sup>  | 61.4               | 70.8 <sup>m</sup>  | 72.3 <sup>c</sup> | 72.7 <sup>t</sup>  | 59.0               |  |
| Most prefers this method                                                           | 57.2     | 51.2    | 53.3              | 66.9 <sup>b</sup>  | 55.9               | 61.8               | 64.5 <sup>p</sup> | 67.5 <sup>u</sup>  | 52.8               |  |
| <b>Place order in person at the pharmacy, %</b>                                    |          |         |                   |                    |                    |                    |                   |                    |                    |  |
| Uses this method                                                                   | 20.6     | 18.9    | 19.8              | 23.0               | 17.3               | 37.0 <sup>c</sup>  | 31.3 <sup>c</sup> | 32.6 <sup>c</sup>  | 26.0 <sup>v</sup>  |  |
| Most prefers this method                                                           | 9.5      | 6.5     | 9.7               | 11.4 <sup>w</sup>  | 7.1                | 22.4 <sup>c</sup>  | 16.1 <sup>c</sup> | 20.9 <sup>c</sup>  | 12.9 <sup>x</sup>  |  |
| <b>Get reminders about appointments, immunizations, etc.</b>                       | (N=2586) | (N=835) | (N=871)           | (N=880)            | (N=843)            | (N=565)            | (N=646)           | (N=218)            | (N=314)            |  |
| <b>Get a secure message using the patient portal, %</b>                            |          |         |                   |                    |                    |                    |                   |                    |                    |  |
| Uses this method                                                                   | 24.3     | 29.2    | 24.4              | 20.6 <sup>k</sup>  | 26.6               | 16.0 <sup>c</sup>  | 16.7 <sup>c</sup> | 9.5 <sup>c</sup>   | 20.6               |  |
| Most prefers this method                                                           | 9.4      | 11.5    | 9.0               | 8.5                | 10.4               | 6.4 <sup>y</sup>   | 6.0 <sup>y</sup>  | 2.5 <sup>z</sup>   | 8.9                |  |
| <b>Get a regular email, %</b>                                                      |          |         |                   |                    |                    |                    |                   |                    |                    |  |
| Uses this method                                                                   | 44.8     | 54.1    | 48.9              | 32.8 <sup>b</sup>  | 48.9               | 28.4 <sup>c</sup>  | 26.2 <sup>c</sup> | 24.7 <sup>c</sup>  | 44.7               |  |
| Most prefers this method                                                           | 29.2     | 33.6    | 35.1              | 18.3 <sup>b</sup>  | 33.0               | 12.3 <sup>c</sup>  | 13.3 <sup>c</sup> | 9.3 <sup>c</sup>   | 25.4 <sup>aa</sup> |  |
| <b>Get an automated phone message from a computer system, %</b>                    |          |         |                   |                    |                    |                    |                   |                    |                    |  |
| Uses this method                                                                   | 39.2     | 41.8    | 41.3              | 34.5               | 39.7               | 45.0               | 40.3              | 25.6 <sup>bb</sup> | 34.0               |  |
| Most prefers this method                                                           | 13.4     | 14.8    | 14.3              | 11.3               | 13.2               | 18.2 <sup>c</sup>  | 18.7 <sup>j</sup> | 6.5 <sup>cc</sup>  | 11.7               |  |
| <b>Get a letter/postcard sent by regular mail, %</b>                               |          |         |                   |                    |                    |                    |                   |                    |                    |  |
| Uses this method                                                                   | 67.8     | 61.9    | 65.4              | 75.1 <sup>dd</sup> | 65.1               | 78.6 <sup>ee</sup> | 75.2 <sup>c</sup> | 85.1 <sup>c</sup>  | 68.6               |  |
| Most prefers this method                                                           | 47.8     | 39.5    | 41.1              | 62.4 <sup>b</sup>  | 43.2               | 63.5 <sup>c</sup>  | 62.8 <sup>c</sup> | 80.5 <sup>c</sup>  | 54.9 <sup>ff</sup> |  |
| <b>Use the Kaiser Permanente preventive care app, %</b>                            |          |         |                   |                    |                    |                    |                   |                    |                    |  |
| Uses this method                                                                   | 5.2      | 6.4     | 6.7               | 2.4 <sup>e</sup>   | 5.3                | 5.7                | 4.1               | 5.3                | 3.6                |  |
| Most prefers this method                                                           | 0.8      | 0.6     | 1.5               | 0.1                | 0.8                | 1.2                | 0.3               | 1.2                | 0.5                |  |

**Table 6. Methods used and preferred for performing tasks that could be done through the patient portal<sup>a</sup>**

|                                                                       | All     |         | By Age Group       |                    |                    |                    | By Race/Ethnicity |                   |                   |  |
|-----------------------------------------------------------------------|---------|---------|--------------------|--------------------|--------------------|--------------------|-------------------|-------------------|-------------------|--|
|                                                                       | 65-79   | 65-69   | 70-74              | 75-79              | non-Hispanic white | Black              | Latino            | Filipino          | Chinese           |  |
| <b>Complete health questionnaires</b> (N=2570)                        | (N=832) | (N=862) | (N=876)            | (N=839)            | (N=560)            | (N=643)            | (N=216)           | (N=312)           |                   |  |
| <b>Online questionnaire accessed via the patient portal, %</b>        |         |         |                    |                    |                    |                    |                   |                   |                   |  |
| Uses this method                                                      | 49.1    | 59.1    | 52.0 <sup>gg</sup> | 38.2 <sup>b</sup>  | 54.5               | 28.3 <sup>c</sup>  | 27.4 <sup>c</sup> | 21.1 <sup>c</sup> | 41.6 <sup>c</sup> |  |
| Most prefers this method                                              | 35.1    | 42.3    | 39.3               | 24.2 <sup>b</sup>  | 39.3               | 19.1 <sup>c</sup>  | 18.6 <sup>c</sup> | 12.8 <sup>c</sup> | 27.8 <sup>c</sup> |  |
| <b>Touchscreen tablet or computer at medical facility, %</b>          |         |         |                    |                    |                    |                    |                   |                   |                   |  |
| Uses this method                                                      | 7.4     | 11.5    | 7.9                | 3.6 <sup>b</sup>   | 7.8                | 6.7                | 5.1 <sup>hh</sup> | 3.9 <sup>ii</sup> | 6.3               |  |
| Most prefers this method                                              | 1.3     | 1.8     | 2.0                | <0.1               | 1.5                | <0.1               | 0.8               | 0.3               | 0.9               |  |
| <b>Interactive Voice Response (IVR) questionnaire<sup>jj</sup>, %</b> |         |         |                    |                    |                    |                    |                   |                   |                   |  |
| Uses this method                                                      | 12.5    | 11.5    | 13.3               | 12.1               | 12.6               | 17.1 <sup>ii</sup> | 10.3              | 7.8               | 10.0              |  |
| Most prefers this method                                              | 2.0     | 2.5     | 1.6                | 2.2                | 1.9                | 3.5                | 2.4               | 2.2               | 1.3               |  |
| <b>Paper (print) questionnaire, %</b>                                 |         |         |                    |                    |                    |                    |                   |                   |                   |  |
| Uses this method                                                      | 77.2    | 70.4    | 76.1               | 83.5 <sup>b</sup>  | 75.3               | 85.0 <sup>c</sup>  | 83.1 <sup>c</sup> | 87.4 <sup>c</sup> | 79.3              |  |
| Most prefers this method                                              | 56.6    | 50.1    | 52.4               | 67.0 <sup>b</sup>  | 52.2               | 71.4 <sup>c</sup>  | 71.1 <sup>c</sup> | 82.4 <sup>c</sup> | 66.6 <sup>c</sup> |  |
| <b>Interviewer administered, %</b>                                    |         |         |                    |                    |                    |                    |                   |                   |                   |  |
| Uses this method                                                      | 18.5    | 13.2    | 18.8 <sup>gg</sup> | 21.7 <sup>kk</sup> | 18.3               | 24.0 <sup>y</sup>  | 21.4              | 12.4              | 12.9              |  |
| Most prefers this method                                              | 5.5     | 3.9     | 5.3                | 7.0                | 5.4                | 6.6                | 8.7 <sup>ll</sup> | 3.2               | 3.4               |  |

<sup>a</sup>Most preferred method restricted to people who indicated only one method or a most preferred method if >1 method was indicated. Cell percentages are based on weighted data for everyone in the age or race/ethnic group. Ns at top of columns are the unweighted number of respondents in that group. *P* values  $\geq .055$  are not reported. See Multimedia Appendix 3 for detailed *P* values.

<sup>b</sup>Significantly differs (*P* < .001) from 65-69 age group after controlling for race/ethnicity and sex.

<sup>c</sup>Significantly differs (*P* < .001) from non-Hispanic white after controlling for age group and sex.

<sup>d</sup>Significantly differs (*P* = .021) from non-Hispanic white after controlling for age group and sex.

<sup>e</sup>Significantly differs (*P* = .005) from 65-69 age group after controlling for race/ethnicity and sex.

<sup>f</sup>Significantly differs (*P* = .004) from non-Hispanic white after controlling for age group and sex.

<sup>g</sup>Significantly differs (*P* = .002) from non-Hispanic white after controlling for age group and sex.

<sup>h</sup>Significantly differs (*P* = .010) from non-Hispanic white after controlling for age group and sex.

<sup>i</sup>Significantly differs (*P* = .045) from 65-69 age group after controlling for race/ethnicity and sex.

<sup>j</sup>Significantly differs (*P* = .024) from non-Hispanic white after controlling for age group and sex.

<sup>k</sup>Significantly differs (*P* = .004) from 65-69 age group after controlling for race/ethnicity and sex.

<sup>l</sup>Significantly differs (*P* = .013) from 65-69 age group after controlling for race/ethnicity and sex.

<sup>m</sup>Significantly differs (*P* = .001) from non-Hispanic white after controlling for age group and sex.

<sup>n</sup>Significantly differs (*P* = .022) from non-Hispanic white after controlling for age group and sex.

<sup>o</sup>Significantly differs (*P* = .028) from 65-69 age group after controlling for race/ethnicity and sex.

<sup>p</sup>Significantly differs (*P* = .007) from non-Hispanic white after controlling for age group and sex.

<sup>q</sup>Significantly differs (*P* = .023) from 65-69 age group after controlling for race/ethnicity and sex.

<sup>r</sup>Significantly differs (*P* = .037) from 65-69 age group after controlling for race/ethnicity and sex.

<sup>s</sup>Restricted to seniors who take medications for a chronic condition and do not rely totally on others to order their prescription refills.

<sup>t</sup>Significantly differs (*P* = .008) from non-Hispanic white after controlling for age group and sex.

<sup>u</sup>Significantly differs (*P* = .011) from non-Hispanic white after controlling for age group and sex.

<sup>v</sup>Significantly differs (*P* = .005) from non-Hispanic white after controlling for age group and sex.

<sup>w</sup>Significantly differs (*P* = .014) from 65-69 age group after controlling for race/ethnicity and sex.

<sup>x</sup>Significantly differs (*P* = .018) from non-Hispanic white after controlling for age group and sex.

<sup>y</sup>Significantly differs (*P* = .020) from non-Hispanic white after controlling for age group and sex.

<sup>z</sup>Significantly differs (*P* = .012) from non-Hispanic white after controlling for age group and sex.

<sup>aa</sup>Significantly differs (*P* = .033) from non-Hispanic white after controlling for age group and sex.

<sup>bb</sup>Significantly differs (*P* = .027) from 65-69 age group after controlling for race/ethnicity and sex.

<sup>cc</sup>Significantly differs (*P* = .048) from non-Hispanic white after controlling for age group and sex.

<sup>dd</sup>Significantly differs (*P* = .003) from non-Hispanic white after controlling for age group and sex.

<sup>ee</sup>Significantly differs (*P* = .030) from 65-69 age group after controlling for race/ethnicity and sex.

<sup>ff</sup>Significantly differs (*P* = .041) from non-Hispanic white after controlling for age group and sex.

<sup>gg</sup>Significantly differs (*P* = .029) from non-Hispanic white after controlling for age group and sex.

<sup>hh</sup>“By phone using the phone keypad to enter answers to questions read by a nice taped voice.”

<sup>ii</sup>Significantly differs (*P* = .002) from 65-69 age group after controlling for race/ethnicity and sex.

<sup>jj</sup>Significantly differs (*P* = .033) from non-Hispanic white after controlling for age group and sex.



**Table 7. Methods seniors are willing to use and would prefer for receiving newsletters and benefits information<sup>a</sup>**

|                                                                              | All      |         | By Age Group      |                   |                    |                   | By Race/Ethnicity |                   |                   |  |
|------------------------------------------------------------------------------|----------|---------|-------------------|-------------------|--------------------|-------------------|-------------------|-------------------|-------------------|--|
|                                                                              | 65–79    | 65–69   | 70–74             | 75–79             | Non-Hispanic white | Black             | Latino            | Filipino          | Chinese           |  |
| <b>Get information about benefits or other topics related to your health</b> | (N=2581) | (N=838) | (N=865)           | (N=878)           | (N=839)            | (N=564)           | (N=647)           | (N=219)           | (N=312)           |  |
| <b>Get an email containing all information in the body of the email, %</b>   |          |         |                   |                   |                    |                   |                   |                   |                   |  |
| Willing to use this method                                                   | 38.6     | 41.9    | 42.5              | 31.1 <sup>b</sup> | 41.4               | 27.8 <sup>c</sup> | 27.7 <sup>c</sup> | 22.9 <sup>c</sup> | 37.5              |  |
| Most prefers this method                                                     | 17.8     | 17.6    | 22.1              | 12.2 <sup>d</sup> | 19.8               | 8.6 <sup>c</sup>  | 10.7 <sup>c</sup> | 8.5 <sup>c</sup>  | 14.5              |  |
| <b>Get an email with pdf attachment, %</b>                                   |          |         |                   |                   |                    |                   |                   |                   |                   |  |
| Willing to use this method                                                   | 23.3     | 31.9    | 25.9              | 13.7 <sup>b</sup> | 25.6               | 15.9 <sup>c</sup> | 12.2 <sup>c</sup> | 12.5 <sup>c</sup> | 18.1 <sup>e</sup> |  |
| Most prefers this method                                                     | 8.9      | 10.6    | 10.5              | 5.6 <sup>f</sup>  | 10.0               | 5.7 <sup>g</sup>  | 3.5 <sup>c</sup>  | 2.9 <sup>c</sup>  | 6.7               |  |
| <b>Get an email with a link to a website, %</b>                              |          |         |                   |                   |                    |                   |                   |                   |                   |  |
| Willing to use this method                                                   | 22.8     | 34.6    | 22.7 <sup>b</sup> | 14.6 <sup>b</sup> | 25.1               | 13.8 <sup>c</sup> | 13.1 <sup>c</sup> | 13.3 <sup>c</sup> | 18.1 <sup>h</sup> |  |
| Most prefers this method                                                     | 7.7      | 12.9    | 6.9               | 5.1               | 8.8                | 2.9 <sup>c</sup>  | 4.1 <sup>i</sup>  | 1.2 <sup>c</sup>  | 5.7               |  |
| <b>Get the information by one or more of the above types of emails, %</b>    |          |         |                   |                   |                    |                   |                   |                   |                   |  |
| Willing to use this method                                                   | 50.9     | 59.5    | 55.0              | 39.3 <sup>b</sup> | 54.8               | 36.0 <sup>c</sup> | 34.0 <sup>c</sup> | 30.7 <sup>c</sup> | 47.9 <sup>j</sup> |  |
| Most prefers this method                                                     | 34.3     | 41.1    | 39.5              | 22.8 <sup>b</sup> | 38.6               | 17.3 <sup>c</sup> | 18.4 <sup>c</sup> | 12.7 <sup>c</sup> | 26.9 <sup>j</sup> |  |
| <b>Get print information by regular mail, %</b>                              |          |         |                   |                   |                    |                   |                   |                   |                   |  |
| Willing to use this method                                                   | 76.6     | 74.0    | 73.3              | 82.7 <sup>k</sup> | 74.4               | 87.1 <sup>c</sup> | 84.0 <sup>c</sup> | 87.2 <sup>c</sup> | 76.9              |  |
| Most prefers this method                                                     | 60.7     | 52.6    | 56.4              | 72.1 <sup>b</sup> | 57.3               | 73.3 <sup>c</sup> | 75.3 <sup>c</sup> | 78.8 <sup>c</sup> | 64.1 <sup>l</sup> |  |
| <b>Get an automated phone message<sup>i</sup>, %</b>                         |          |         |                   |                   |                    |                   |                   |                   |                   |  |
| Willing to use this method                                                   | 9.4      | 9.6     | 8.8               | 9.9               | 9.1                | 13.8 <sup>h</sup> | 13.0 <sup>n</sup> | 4.4 <sup>o</sup>  | 6.4               |  |
| Most prefers this method                                                     | 0.6      | 0.9     | 0.3               | 0.7               | 0.4                | 1.8 <sup>p</sup>  | 2.5 <sup>q</sup>  | 0.4               | <0.1              |  |
| <b>Get health newsletters<sup>m</sup></b>                                    | (N=2377) | (N=769) | (N=790)           | (N=818)           | (N=815)            | (N=480)           | (N=594)           | (N=187)           | (N=301)           |  |
| <b>Get an email containing the newsletter in the body of the email, %</b>    |          |         |                   |                   |                    |                   |                   |                   |                   |  |
| Willing to use this method                                                   | 39.2     | 44.0    | 44.5              | 28.5 <sup>b</sup> | 42.8               | 25.9 <sup>c</sup> | 24.0 <sup>c</sup> | 21.2 <sup>c</sup> | 33.4 <sup>r</sup> |  |
| Most prefers this method                                                     | 21.6     | 22.6    | 25.5              | 16.0 <sup>s</sup> | 23.9               | 11.4 <sup>c</sup> | 13.3 <sup>c</sup> | 11.7 <sup>c</sup> | 17.3 <sup>t</sup> |  |
| <b>Get an email with a pdf attachment, %</b>                                 |          |         |                   |                   |                    |                   |                   |                   |                   |  |
| Willing to use this method                                                   | 23.8     | 31.8    | 25.3 <sup>u</sup> | 16.0 <sup>b</sup> | 26.4               | 16.0 <sup>c</sup> | 12.4 <sup>c</sup> | 11.2 <sup>c</sup> | 15.5 <sup>c</sup> |  |
| Most prefers this method                                                     | 10.4     | 11.9    | 12.1              | 7.0 <sup>s</sup>  | 11.8               | 6.7 <sup>v</sup>  | 5.0 <sup>c</sup>  | 1.4 <sup>c</sup>  | 7.1 <sup>w</sup>  |  |
| <b>Get an email with a link to a website, %</b>                              |          |         |                   |                   |                    |                   |                   |                   |                   |  |
| Willing to use this method                                                   | 24.0     | 32.2    | 25.2 <sup>x</sup> | 16.4 <sup>b</sup> | 26.3               | 14.9 <sup>c</sup> | 13.7 <sup>c</sup> | 14.2 <sup>c</sup> | 21.9              |  |
| Most prefers this method                                                     | 9.5      | 13.9    | 10.4              | 5.3 <sup>b</sup>  | 10.5               | 5.5 <sup>q</sup>  | 5.1 <sup>i</sup>  | 4.8 <sup>y</sup>  | 10.5              |  |
| <b>Get the newsletter in ≥1 of email types, %</b>                            |          |         |                   |                   |                    |                   |                   |                   |                   |  |
| Willing to use this method                                                   | 54.5     | 62.5    | 59.3              | 42.2 <sup>b</sup> | 59.3               | 37.2 <sup>c</sup> | 34.4 <sup>c</sup> | 30.0 <sup>c</sup> | 48.2 <sup>j</sup> |  |
| Most prefers this method                                                     | 38.4     | 44.0    | 44.2              | 26.6 <sup>b</sup> | 42.7               | 21.2 <sup>c</sup> | 22.1 <sup>c</sup> | 16.5 <sup>c</sup> | 32.0 <sup>j</sup> |  |
| <b>Get a print newsletter by regular mail, %</b>                             |          |         |                   |                   |                    |                   |                   |                   |                   |  |
| Willing to use this method                                                   | 65.9     | 62.0    | 60.5              | 75.8 <sup>b</sup> | 62.7               | 80.3 <sup>c</sup> | 77.8 <sup>c</sup> | 80.8 <sup>c</sup> | 68.1              |  |
| Most prefers this method                                                     | 58.7     | 51.9    | 52.3              | 71.7 <sup>b</sup> | 54.1               | 76.4 <sup>c</sup> | 76.6 <sup>c</sup> | 82.2 <sup>c</sup> | 65.1 <sup>q</sup> |  |

<sup>a</sup>Most preferred method restricted to people who indicated only one method or a most preferred method if >1 method was indicated. Cell percentages are based on weighted data for everyone in the age or race/ethnic group. Ns at top of columns are the unweighted number of respondents in that group. *P* values ≥.055 are not reported. See Multimedia Appendix 3 for detailed *P* values.

<sup>b</sup>Significantly differs (*P* < .001) from 65-69 age group after controlling for race/ethnicity and sex.

<sup>c</sup>Significantly differs (*P* < .001) from WhiteNH after controlling for age group and sex.

<sup>d</sup>Significantly differs (*P* = .039) from 65-69 age group after controlling for race/ethnicity and sex.

<sup>e</sup>Significantly differs (*P* = .007) from non-Hispanic white after controlling for age group and sex.

<sup>f</sup>Significantly differs (*P* = .009) from 65-69 age group after controlling for race/ethnicity and sex.

<sup>g</sup>Significantly differs (*P* = .009) from non-Hispanic white after controlling for age group and sex.

<sup>h</sup>Significantly differs (*P* = .015) from non-Hispanic white after controlling for age group and sex.

<sup>i</sup>Significantly differs (*P* = .001) from non-Hispanic white after controlling for age group and sex.

<sup>j</sup>Differs (*P* = .050) from non-Hispanic white after controlling for age group and sex.

<sup>k</sup>Significantly differs (*P* = .002) from 65-69 age group after controlling for race/ethnicity and sex.

<sup>l</sup>Significantly differs (*P* = .002) from non-Hispanic white after controlling for age group and sex.

<sup>m</sup>Restricted to people who completed the longer form of the questionnaire

<sup>n</sup>Significantly differs (*P* = .035) from non-Hispanic white after controlling for age group and sex.

Table 7 notes continued:

- <sup>o</sup>Significantly differs ( $P = .024$ ) from non-Hispanic white after controlling for age group and sex.
- <sup>p</sup>Significantly differs ( $P = .026$ ) from non-Hispanic white after controlling for age group and sex.
- <sup>q</sup>Significantly differs ( $P = .003$ ) from non-Hispanic white after controlling for age group and sex.
- <sup>r</sup>Significantly differs ( $P = .013$ ) from non-Hispanic white after controlling for age group and sex.
- <sup>s</sup>Significantly differs ( $P = .022$ ) from 65-69 age group after controlling for race/ethnicity and sex.
- <sup>t</sup>Significantly differs ( $P = .040$ ) from non-Hispanic white after controlling for age group and sex.
- <sup>u</sup>Significantly differs ( $P = .040$ ) from 65-69 age group after controlling for race/ethnicity and sex.
- <sup>v</sup>Significantly differs ( $P = .005$ ) from non-Hispanic white after controlling for age group and sex.
- <sup>w</sup>Significantly differs ( $P = .023$ ) from non-Hispanic white after controlling for age group and sex.
- <sup>x</sup>Significantly differs ( $P = .027$ ) from 65-69 age group after controlling for race/ethnicity and sex.
- <sup>y</sup>Significantly differs ( $P = .020$ ) from non-Hispanic white after controlling for age group and sex.

**Table 8. Willingness to perform health care–related tasks online<sup>a</sup>**

| Health care–related tasks                                                                                     | All   | By Age Group |                   |                   |                    | By Race/Ethnicity |                   |                   |                   |  |
|---------------------------------------------------------------------------------------------------------------|-------|--------------|-------------------|-------------------|--------------------|-------------------|-------------------|-------------------|-------------------|--|
|                                                                                                               | 65-79 | 65-69        | 70-74             | 75-79             | Non-Hispanic white | Black             | Latino            | Filipino          | Chinese           |  |
| <b>Currently communicates at least sometimes with doctor using secure messaging when not urgent, %</b>        |       |              |                   |                   |                    |                   |                   |                   |                   |  |
| All                                                                                                           | 58.2  | 70.0         | 58.7 <sup>b</sup> | 48.8 <sup>b</sup> | 63.6               | 33.8 <sup>c</sup> | 36.6 <sup>c</sup> | 32.2 <sup>c</sup> | 55.6 <sup>d</sup> |  |
| Those who can use the Internet                                                                                | 71.8  | 77.9         | 70.3 <sup>b</sup> | 68.5 <sup>b</sup> | 74.6               | 51.0 <sup>c</sup> | 58.8 <sup>c</sup> | 58.1 <sup>c</sup> | 68.9              |  |
| <b>Currently views lab test results online at least sometimes, %</b>                                          |       |              |                   |                   |                    |                   |                   |                   |                   |  |
| All                                                                                                           | 54.4  | 64.9         | 55.4 <sup>e</sup> | 45.5 <sup>b</sup> | 58.8               | 31.1 <sup>c</sup> | 36.3 <sup>c</sup> | 33.5 <sup>c</sup> | 63.6              |  |
| Those who can use the Internet                                                                                | 67.1  | 72.9         | 66.3 <sup>b</sup> | 63.2              | 69.0               | 47.4 <sup>c</sup> | 57.9 <sup>c</sup> | 60.0 <sup>c</sup> | 75.3              |  |
| <b>Currently orders prescription refills online at least sometimes<sup>g</sup>, %</b>                         |       |              |                   |                   |                    |                   |                   |                   |                   |  |
| All                                                                                                           | 35.7  | 45.0         | 39.1              | 24.8 <sup>b</sup> | 39.7               | 20.0 <sup>c</sup> | 22.1 <sup>c</sup> | 12.8 <sup>c</sup> | 36.1              |  |
| Those who can use the Internet                                                                                | 44.4  | 50.2         | 47.8              | 34.2 <sup>b</sup> | 46.8               | 29.9 <sup>c</sup> | 36.3 <sup>c</sup> | 22.8 <sup>c</sup> | 43.4              |  |
| <b>Willing to complete health questionnaires online, %</b>                                                    |       |              |                   |                   |                    |                   |                   |                   |                   |  |
| All                                                                                                           | 49.1  | 59.1         | 52.0 <sup>g</sup> | 38.2 <sup>b</sup> | 54.5               | 28.3 <sup>c</sup> | 27.4 <sup>c</sup> | 21.1 <sup>c</sup> | 41.6 <sup>c</sup> |  |
| Those who can use the Internet                                                                                | 61.5  | 66.6         | 63.5              | 53.7 <sup>b</sup> | 64.7               | 43.7 <sup>c</sup> | 45.3 <sup>c</sup> | 39.4 <sup>c</sup> | 51.5 <sup>c</sup> |  |
| <b>Willing to complete health questionnaires in the clinic using a tablet or touchscreen computer, %</b>      |       |              |                   |                   |                    |                   |                   |                   |                   |  |
| All                                                                                                           | 7.4   | 11.5         | 7.9               | 3.6 <sup>b</sup>  | 7.8                | 6.7               | 5.1 <sup>h</sup>  | 3.9 <sup>i</sup>  | 6.3               |  |
| Those who can use the Internet                                                                                | 9.1   | 13.0         | 9.4               | 5.1 <sup>b</sup>  | 9.3                | 9.5               | 7.8               | 5.6               | 7.9               |  |
| <b>Willing to read health information online at health plan or other website, %</b>                           |       |              |                   |                   |                    |                   |                   |                   |                   |  |
| All                                                                                                           | 35.4  | 42.4         | 38.4              | 26.4 <sup>b</sup> | 39.1               | 22.4 <sup>c</sup> | 20.5 <sup>c</sup> | 15.9 <sup>c</sup> | 28.3 <sup>j</sup> |  |
| Those who can use the Internet                                                                                | 44.3  | 47.7         | 46.5              | 37.6 <sup>b</sup> | 46.4               | 34.0 <sup>c</sup> | 33.6 <sup>c</sup> | 29.8 <sup>c</sup> | 34.9 <sup>c</sup> |  |
| <b>Willing to watch health videos online at health plan website or another website like YouTube, %</b>        |       |              |                   |                   |                    |                   |                   |                   |                   |  |
| All                                                                                                           | 24.5  | 27.4         | 27.9              | 18.0 <sup>k</sup> | 26.7               | 17.5 <sup>c</sup> | 15.2 <sup>c</sup> | 11.6 <sup>c</sup> | 24.3              |  |
| Those who can use the Internet                                                                                | 30.5  | 30.7         | 33.4              | 25.7              | 31.4               | 26.8              | 24.9 <sup>c</sup> | 20.2 <sup>c</sup> | 30.3              |  |
| <b>Willing to consider (“yes” or “maybe”) a video visit with doctor instead of an office visit, %</b>         |       |              |                   |                   |                    |                   |                   |                   |                   |  |
| All                                                                                                           | 33.8  | 44.6         | 36.6 <sup>k</sup> | 22.0 <sup>l</sup> | 36.5               | 24.8 <sup>m</sup> | 20.6 <sup>m</sup> | 19.3 <sup>m</sup> | 31.6              |  |
| Those who can use the Internet                                                                                | 41.7  | 49.5         | 44.8              | 29.5 <sup>b</sup> | 42.8               | 37.7              | 32.8 <sup>m</sup> | 34.3 <sup>n</sup> | 36.0              |  |
| <b>Willing to get health care–related information by email (in body of email, pdf attachment, or link), %</b> |       |              |                   |                   |                    |                   |                   |                   |                   |  |
| All                                                                                                           | 50.9  | 59.5         | 55.0              | 39.3 <sup>b</sup> | 54.8               | 36.0 <sup>c</sup> | 34.0 <sup>c</sup> | 30.7 <sup>c</sup> | 47.9              |  |
| Those who can use the Internet                                                                                | 63.5  | 68.1         | 67.8              | 53.5 <sup>b</sup> | 65.1               | 56.3 <sup>c</sup> | 55.5 <sup>c</sup> | 52.9 <sup>c</sup> | 58.1              |  |

<sup>a</sup> Ability to use the Internet was assigned based on a “Yes” answer to the question “Can you use the Internet to get information from websites or to communicate with others?” Most senior Internet users were able go online on their own, but some indicated needing help or someone to go online for them. Ability to use email was assigned using the same type of question and responses. Cell percentages are based on weighted data for everyone in that age or race/ethnic group. Because percentages are based on responses to different questions, unweighted cell Ns vary. Most cell Ns can be ascertained from earlier tables, and they are also provided in Multimedia Appendix 4.

*P* values  $\geq .055$  are not reported. See Multimedia Appendix 3 for detailed *P* values.

<sup>b</sup> Significantly differs ( $P < .001$ ) from 65-69 age group after controlling for race/ethnicity and sex.

<sup>c</sup> Significantly differs ( $P < .001$ ) from WhiteNH after controlling for age group and sex.

<sup>d</sup> Significantly differs ( $P = .021$ ) from WhiteNH after controlling for age group and sex.

<sup>e</sup> Significantly differs ( $P = .004$ ) from 65-69 age group after controlling for race/ethnicity and sex.

<sup>f</sup> Restricted to seniors who take medications for a chronic condition and do not rely totally on others to order their prescription refills.

<sup>g</sup> Significantly differs ( $P = .030$ ) from WhiteNH after controlling for age group and sex.

<sup>h</sup> Significantly differs ( $P = .036$ ) from WhiteNH after controlling for age group and sex.

<sup>i</sup> Significantly differs ( $P = .045$ ) from WhiteNH after controlling for age group and sex.

<sup>j</sup> Significantly differs ( $P = .002$ ) from WhiteNH after controlling for age group and sex.

<sup>k</sup> Significantly differs ( $P = .002$ ) from WhiteNH after controlling for age group and sex.

<sup>l</sup> Significantly differs ( $P = .019$ ) from 65-69 age group after controlling for race/ethnicity and sex.

<sup>m</sup> Significantly differs ( $P = .001$ ) from WhiteNH after controlling for age group and sex.

<sup>n</sup> Significantly differs ( $P = .048$ ) from WhiteNH after controlling for age group and sex.

**Table 9. Seniors' opinions on the effect of technology on ease of health care communication and education<sup>a</sup>**

| Health care–related tasks                                                      | All   | By Age Group |                   | By Race/Ethnicity  |                   |                   |                   |                   |
|--------------------------------------------------------------------------------|-------|--------------|-------------------|--------------------|-------------------|-------------------|-------------------|-------------------|
|                                                                                | 65-79 | 65-74        | 75-79             | Non-Hispanic white | Black             | Latino            | Filipino          | Chinese           |
| <b>Get information about your health plan benefits and costs, %</b>            |       |              |                   |                    |                   |                   |                   |                   |
| Easier                                                                         | 46.8  | 50.2         | 38.9 <sup>b</sup> | 46.1               | 48.0              | 47.2              | 53.7              | 50.5              |
| Harder                                                                         | 16.8  | 13.8         | 23.7 <sup>c</sup> | 15.0               | 20.9 <sup>d</sup> | 23.4 <sup>e</sup> | 29.8 <sup>f</sup> | 21.1 <sup>g</sup> |
| <b>Communicate with your doctor, %</b>                                         |       |              |                   |                    |                   |                   |                   |                   |
| Easier                                                                         | 73.3  | 76.5         | 65.9 <sup>h</sup> | 76.1               | 58.2 <sup>g</sup> | 63.2 <sup>g</sup> | 61.4 <sup>g</sup> | 69.3              |
| Harder                                                                         | 11.8  | 9.6          | 17.0 <sup>h</sup> | 10.1               | 16.7 <sup>i</sup> | 18.7 <sup>g</sup> | 24.4 <sup>g</sup> | 14.6              |
| <b>Ability to get lab test results, %</b>                                      |       |              |                   |                    |                   |                   |                   |                   |
| Easier                                                                         | 74.8  | 77.5         | 68.6 <sup>j</sup> | 77.2               | 60.0 <sup>g</sup> | 65.6 <sup>g</sup> | 64.9 <sup>k</sup> | 74.8              |
| Harder                                                                         | 11.1  | 9.1          | 15.7 <sup>j</sup> | 9.5                | 16.6 <sup>e</sup> | 17.1 <sup>g</sup> | 21.0 <sup>g</sup> | 14.2              |
| <b>Get information you want about health conditions and treatments, %</b>      |       |              |                   |                    |                   |                   |                   |                   |
| Easier                                                                         | 59.5  | 62.6         | 52.4 <sup>l</sup> | 60.3               | 53.3 <sup>m</sup> | 57.3              | 56.4              | 62.0              |
| Harder                                                                         | 12.9  | 10.6         | 18.2 <sup>h</sup> | 11.0               | 18.0 <sup>n</sup> | 18.4 <sup>k</sup> | 26.8 <sup>g</sup> | 18.3 <sup>o</sup> |
| <b>Get health education to help you improve your health or reduce risks, %</b> |       |              |                   |                    |                   |                   |                   |                   |
| Easier                                                                         | 57.6  | 61.5         | 48.2 <sup>h</sup> | 58.3               | 52.5              | 54.3              | 56.6              | 57.8              |
| Harder                                                                         | 12.4  | 10.1         | 17.8 <sup>b</sup> | 10.5               | 16.8 <sup>p</sup> | 20.0 <sup>g</sup> | 25.6 <sup>g</sup> | 17.1 <sup>q</sup> |
| <b>Manage your health care, %</b>                                              |       |              |                   |                    |                   |                   |                   |                   |
| Easier                                                                         | 61.7  | 66.2         | 50.8 <sup>h</sup> | 63.2               | 53.5 <sup>i</sup> | 56.5 <sup>r</sup> | 54.4 <sup>s</sup> | 61.7              |
| Harder                                                                         | 12.1  | 10.0         | 17.3 <sup>j</sup> | 10.5               | 15.5 <sup>t</sup> | 19.0 <sup>g</sup> | 23.9 <sup>g</sup> | 15.4              |

<sup>a</sup>Seniors were asked whether the health plan's shift toward using its website and patient portal has made it easier or harder for them to obtain information and communicate with their doctors. Analyses were restricted to people who expressed an opinion (including that there had been no change) about their ability to perform this task. Cell percentages are based on weighted data for everyone in the age or race/ethnic group. Because people did not indicate opinions about all tasks, unweighted cell Ns vary; they are provided in Multimedia Appendix 4. *P* values  $\geq .055$  are not reported. See Multimedia Appendix 3 for detailed *P* values.

<sup>b</sup> Significantly differs ( $P = .001$ ) from 65–74 age group after controlling for race/ethnicity and sex.

<sup>c</sup> Significantly differs ( $P = .024$ ) from 65–74 age group after controlling for race/ethnicity and sex.

<sup>d</sup> Significantly differs ( $P = .001$ ) from WhiteNH after controlling for age group and sex.

<sup>e</sup> Significantly differs ( $P = .050$ ) from WhiteNH after controlling for age group and sex.

<sup>f</sup> Significantly differs ( $P < .001$ ) from 65-74 age group after controlling for race/ethnicity and sex.

<sup>g</sup> Significantly differs ( $P < .001$ ) from WhiteNH after controlling for age group and sex.

<sup>h</sup> Significantly differs ( $P < .001$ ) from 65-74 age group after controlling for race/ethnicity and sex.

<sup>i</sup> Significantly differs ( $P = .004$ ) from WhiteNH after controlling for age group and sex.

<sup>j</sup> Significantly differs ( $P = .002$ ) from 65-74 age group after controlling for race/ethnicity and sex.

<sup>k</sup> Significantly differs ( $P = .002$ ) from WhiteNH after controlling for age group and sex.

<sup>l</sup> Significantly differs ( $P = .003$ ) from 65-74 age group after controlling for race/ethnicity and sex.

<sup>m</sup> Significantly differs ( $P = .032$ ) from WhiteNH after controlling for age group and sex.

<sup>n</sup> Significantly differs ( $P = .003$ ) from WhiteNH after controlling for age group and sex.

<sup>o</sup> Significantly differs ( $P = .011$ ) from WhiteNH after controlling for age group and sex.

<sup>p</sup> Significantly differs ( $P = .006$ ) from WhiteNH after controlling for age group and sex.

<sup>q</sup> Significantly differs ( $P = .023$ ) from WhiteNH after controlling for age group and sex.

<sup>r</sup> Significantly differs ( $P = .053$ ) from WhiteNH after controlling for age group and sex.

<sup>s</sup> Significantly differs ( $P = .036$ ) from WhiteNH after controlling for age group and sex.

<sup>t</sup> Significantly differs ( $P = .034$ ) from WhiteNH after controlling for age group and sex.
