# Supplementary material for: Differences in Access to and Preferences for Using Patient Portals and Other eHealth Technologies Based on Race, Ethnicity, and Age: A Database and Survey Study of Seniors in a Large Health Plan
Source: PubMed Central journal article supplement (PMC4799429; doi:10.2196/jmir.5105), 2016-03-04
Supplement: jmir_v18i3e50_app4.pdf [file jmir_v18i3e50_app4.pdf]

**Unweighted cell Ns for Table 8 (Willingness to perform healthcare-related tasks online)**

|                                                                                                    | All   | By Age Group |       |       |                    | By Race/Ethnicity |        |          |         |  |
|----------------------------------------------------------------------------------------------------|-------|--------------|-------|-------|--------------------|-------------------|--------|----------|---------|--|
|                                                                                                    | 65–79 | 65–69        | 70–74 | 75–79 | non-Hispanic white | Black             | Latino | Filipino | Chinese |  |
| <b>Healthcare-related tasks</b>                                                                    |       |              |       |       |                    |                   |        |          |         |  |
| Currently communicates at least sometimes with doctor using secure messaging when not urgent       |       |              |       |       |                    |                   |        |          |         |  |
| All                                                                                                | 2534  | 822          | 858   | 854   | 826                | 555               | 628    | 215      | 310     |  |
| Those who can use the Internet                                                                     | 1916  | 719          | 645   | 552   | 715                | 401               | 416    | 132      | 252     |  |
| Currently views lab test results online at least sometimes                                         |       |              |       |       |                    |                   |        |          |         |  |
| All                                                                                                | 2594  | 838          | 874   | 882   | 847                | 566               | 649    | 219      | 313     |  |
| Those who can use the Internet                                                                     | 1943  | 725          | 654   | 554   | 731                | 403               | 423    | 132      | 254     |  |
| Currently orders prescription refills online at least sometimes <sup>a</sup>                       |       |              |       |       |                    |                   |        |          |         |  |
| All                                                                                                | 2258  | 715          | 764   | 779   | 731                | 521               | 561    | 187      | 258     |  |
| Those who can use the Internet                                                                     | 1697  | 620          | 572   | 505   | 635                | 370               | 366    | 113      | 213     |  |
| Willing to complete health questionnaires online                                                   |       |              |       |       |                    |                   |        |          |         |  |
| All                                                                                                | 2570  | 832          | 862   | 876   | 839                | 560               | 643    | 216      | 312     |  |
| Those who can use the Internet                                                                     | 1929  | 720          | 646   | 563   | 724                | 399               | 421    | 131      | 254     |  |
| Willing to complete health questionnaires in the clinic using a tablet or touchscreen computer     |       |              |       |       |                    |                   |        |          |         |  |
| All                                                                                                | 2570  | 832          | 862   | 876   | 839                | 560               | 643    | 216      | 312     |  |
| Those who can use the Internet                                                                     | 1929  | 720          | 646   | 563   | 724                | 399               | 421    | 131      | 254     |  |
| Willing to read health information online at health plan or other website                          |       |              |       |       |                    |                   |        |          |         |  |
| All                                                                                                | 2602  | 841          | 878   | 883   | 849                | 567               | 653    | 219      | 314     |  |
| Those who can use the Internet                                                                     | 1948  | 728          | 656   | 564   | 732                | 404               | 426    | 132      | 255     |  |
| Willing to watch health videos online at health plan website or another website like YouTube       |       |              |       |       |                    |                   |        |          |         |  |
| All                                                                                                | 2602  | 841          | 878   | 883   | 849                | 567               | 653    | 219      | 314     |  |
| Those who can use the Internet                                                                     | 1948  | 728          | 656   | 564   | 732                | 404               | 426    | 132      | 255     |  |
| Willing to consider (“yes” or “maybe”) an MD video visit instead of office visit                   |       |              |       |       |                    |                   |        |          |         |  |
| All                                                                                                | 2597  | 838          | 878   | 881   | 848                | 567               | 652    | 216      | 314     |  |
| Those who can use the Internet                                                                     | 1944  | 725          | 656   | 563   | 731                | 404               | 424    | 130      | 255     |  |
| Willing to get healthcare-related information by email (in body of email, pdf attachment, or link) |       |              |       |       |                    |                   |        |          |         |  |
| All                                                                                                | 2581  | 838          | 865   | 878   | 839                | 564               | 647    | 219      | 312     |  |
| Those who can use email                                                                            | 1942  | 715          | 647   | 580   | 717                | 395               | 432    | 139      | 259     |  |

<sup>a</sup> Restricted to seniors who take medications for a chronic condition and do not rely totally on others to order their prescription refills

**Unweighted cell Ns for Table 9 (Seniors' opinions on the effect of technology on ease of healthcare communication and education)<sup>a</sup>**

| Healthcare-related tasks                                             | All   | By Age Group |       | By Race/Ethnicity  |       |        |          |         |
|----------------------------------------------------------------------|-------|--------------|-------|--------------------|-------|--------|----------|---------|
|                                                                      | 65–79 | 65–74        | 75–79 | non-Hispanic white | Black | Latino | Filipino | Chinese |
| Get information about your health plan benefits and costs            | 1975  | 1344         | 631   | 667                | 421   | 463    | 175      | 259     |
| Communicate with your doctor                                         | 2146  | 1462         | 684   | 729                | 444   | 508    | 186      | 279     |
| Ability to get lab test results                                      | 2143  | 1463         | 680   | 735                | 441   | 499    | 184      | 284     |
| Get information you want about health conditions and treatments      | 2050  | 1399         | 651   | 688                | 430   | 481    | 177      | 274     |
| Get health education to help you improve your health or reduce risks | 1981  | 1356         | 625   | 668                | 416   | 457    | 173      | 267     |
| Manage your healthcare                                               | 2016  | 1380         | 636   | 678                | 424   | 466    | 175      | 273     |

<sup>a</sup> Responses are restricted to people who expressed an opinion (including that there had been no change) about their ability to perform this task.
